# Supplementary material for: Discovery of Novel 3,4-Dihydro-2(1H)-Quinolinone Sulfonamide Derivatives as New Tubulin Polymerization Inhibitors with Anti-Cancer Activity
Source: Molecules. 2022 Feb 24;27(5):1537. doi: 10.3390/molecules27051537 (PMC8911884; doi:10.3390/molecules27051537)
Supplement: Supplementary file 1 [file molecules-27-01537-s001.zip › molecules-1446327-supplementary.pdf]

**Synthesis, Evaluation, and Mechanism Study of Quinoline-sulfonamide  
Derivatives Exerting Effective Antitumor Activity Through Microtubule  
Destabilization**

Juan Ma<sup>1</sup>, Guo-Hua Gong<sup>2,3\*</sup>

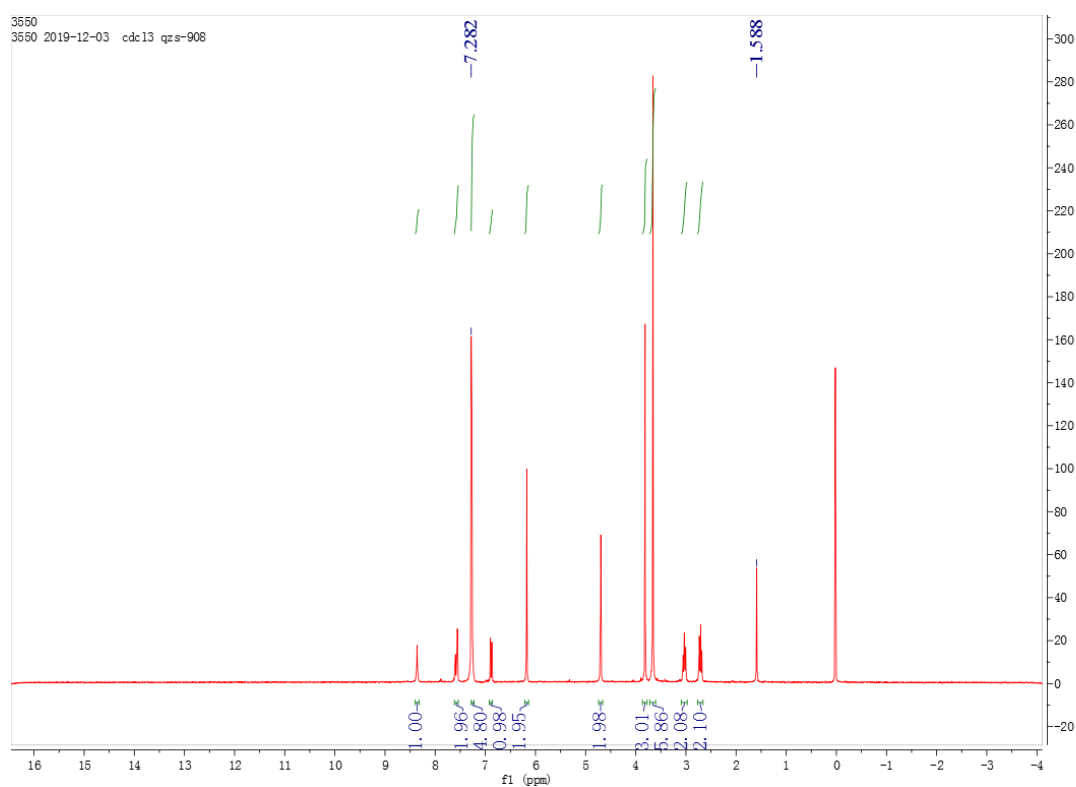

**Figure S1.** The <sup>1</sup>H NMR compound D1

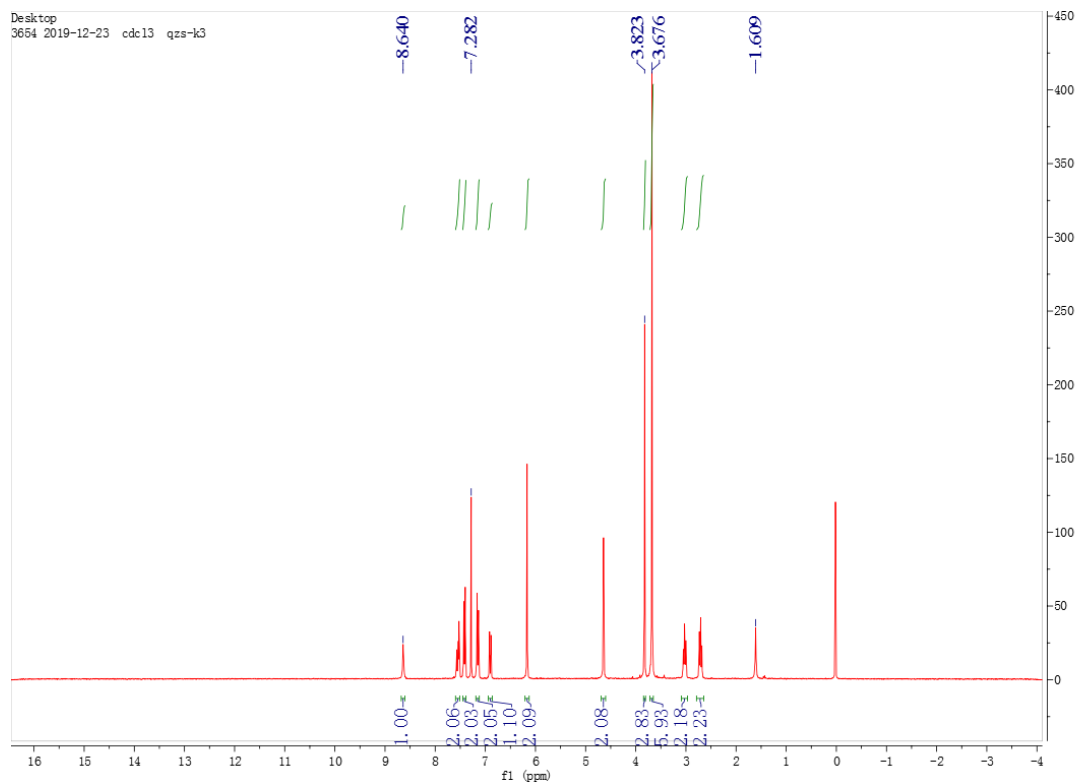

**Figure S2.** The  $^1\text{H}$  NMR compound D2

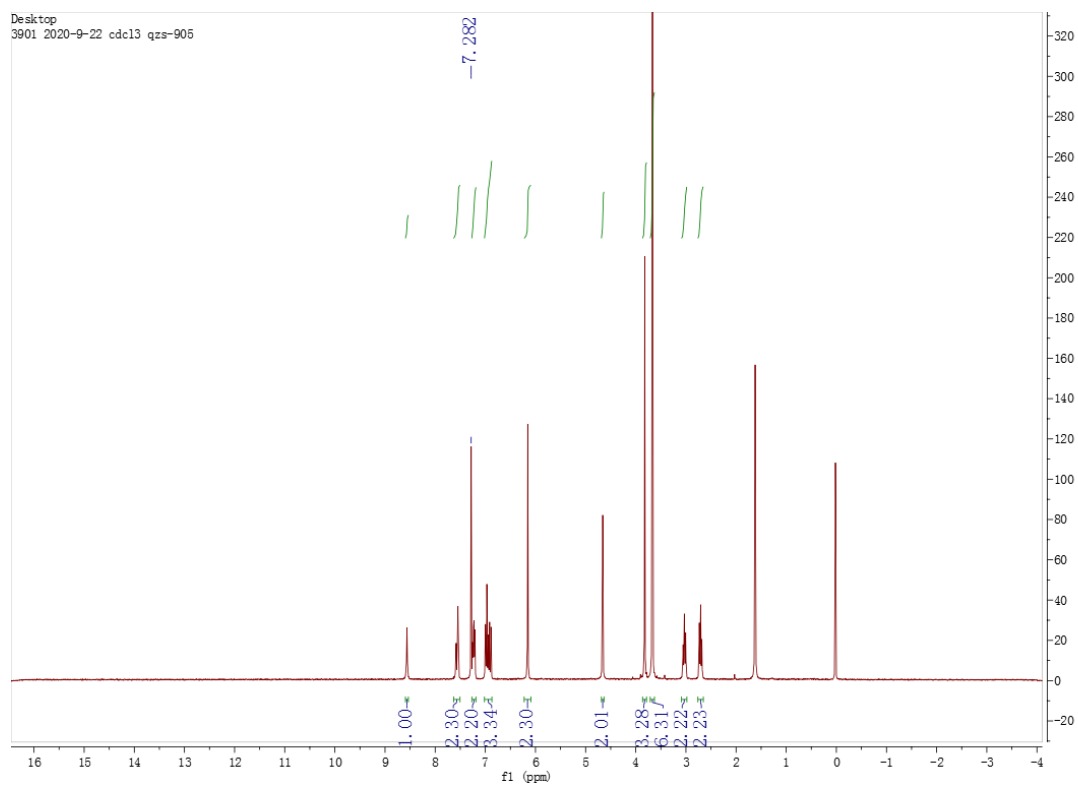

**Figure S3.** The  $^1\text{H}$  NMR compound D3

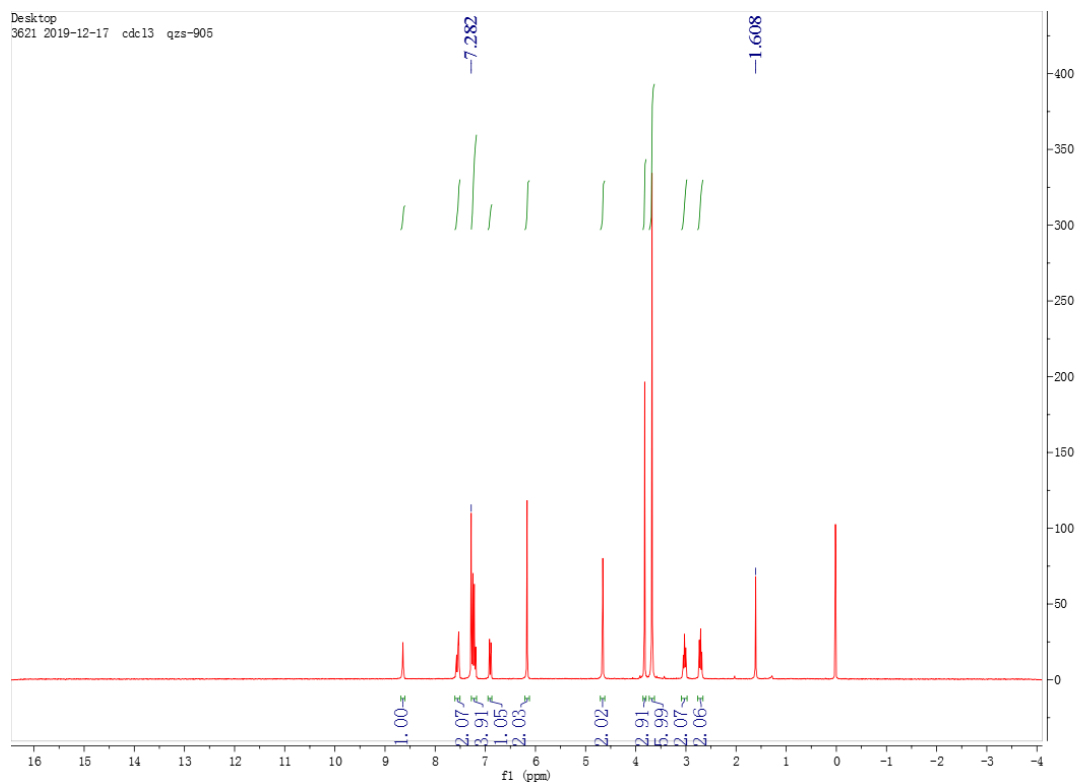

**Figure S4.** The  $^1\text{H}$  NMR compound D4

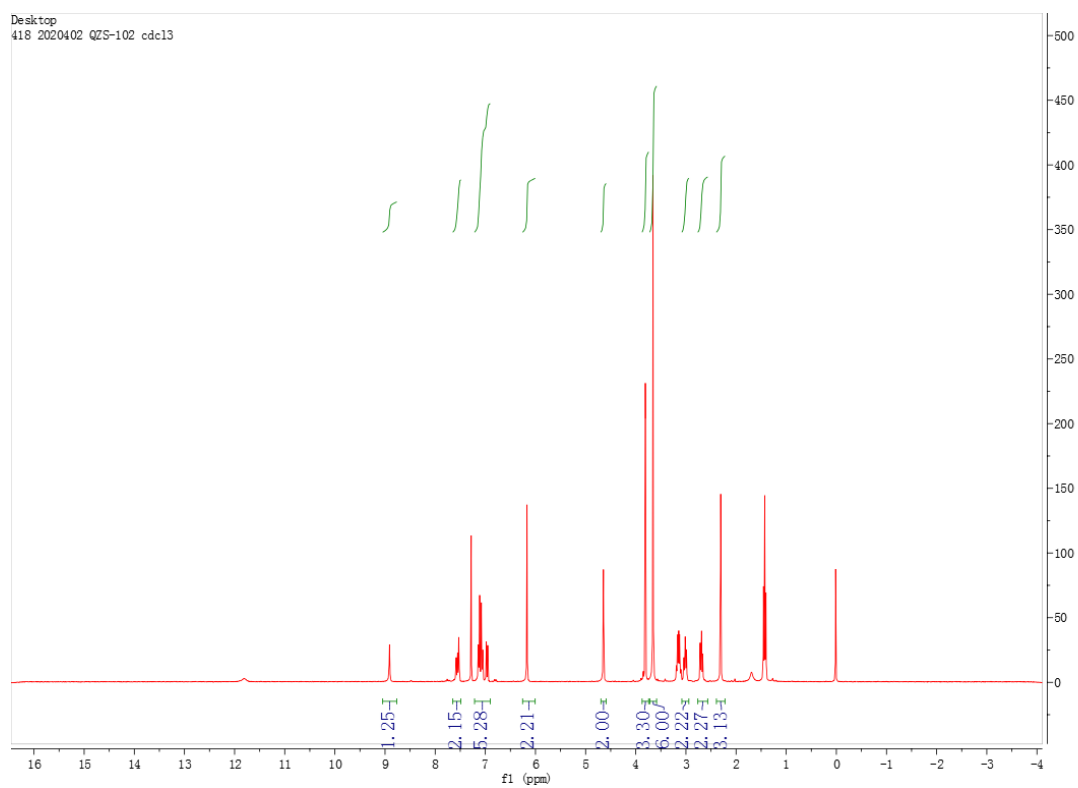

**Figure S5.** The  $^1\text{H}$  NMR compound D5

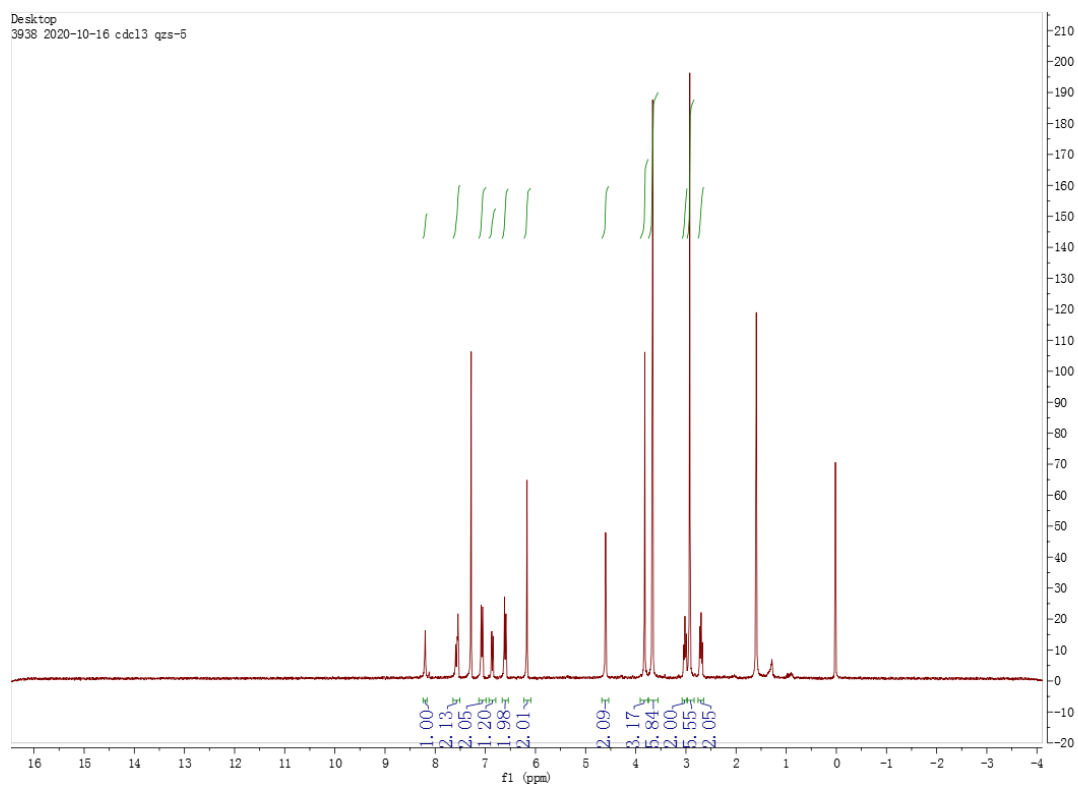

**Figure S6.** The  $^1\text{H}$  NMR compound D6

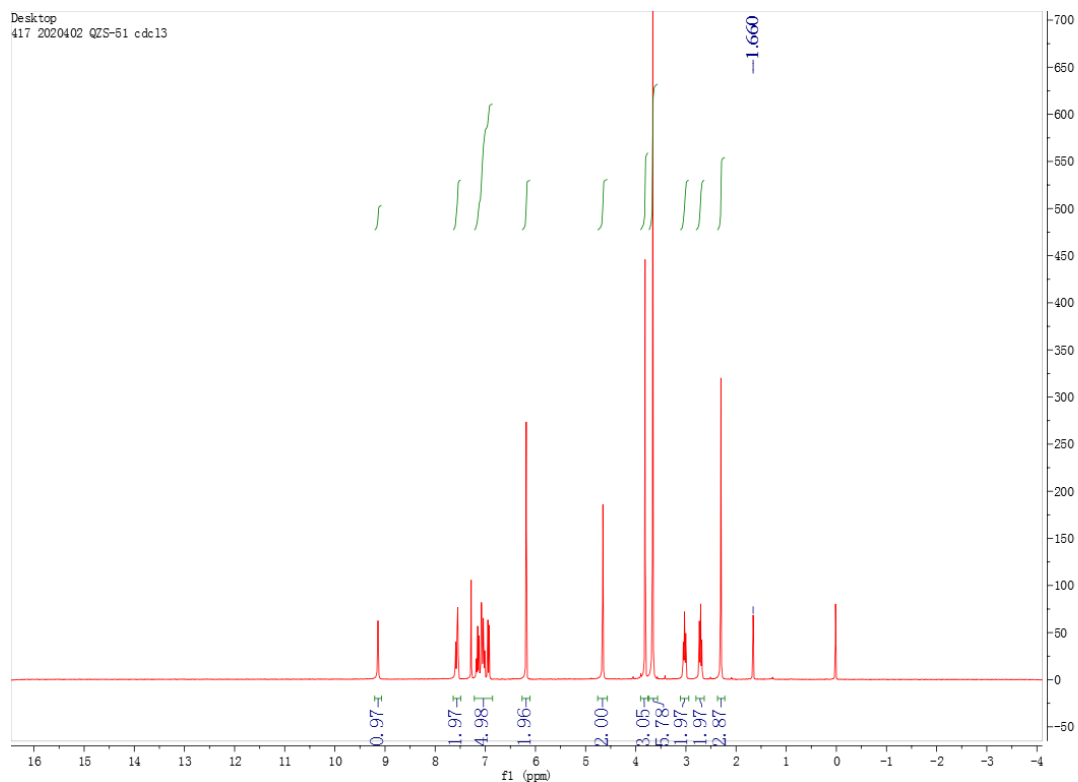

**Figure S7.** The  $^1\text{H}$  NMR compound D7

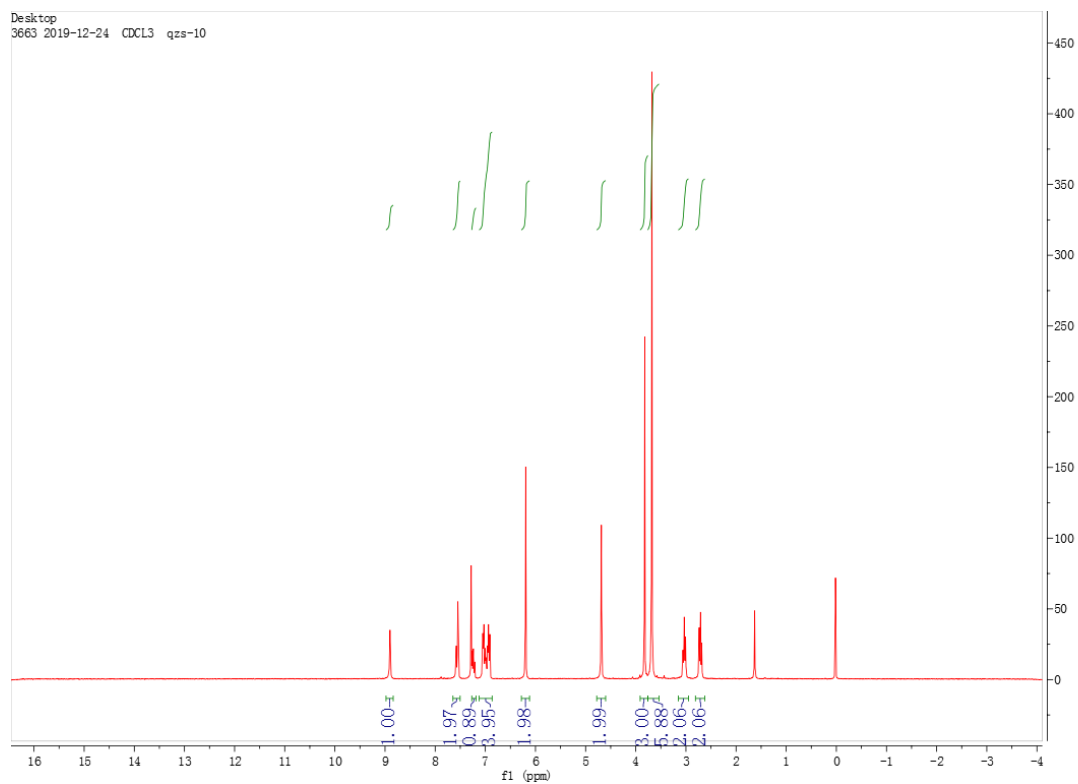

**Figure S8.** The  $^1\text{H}$  NMR compound D8

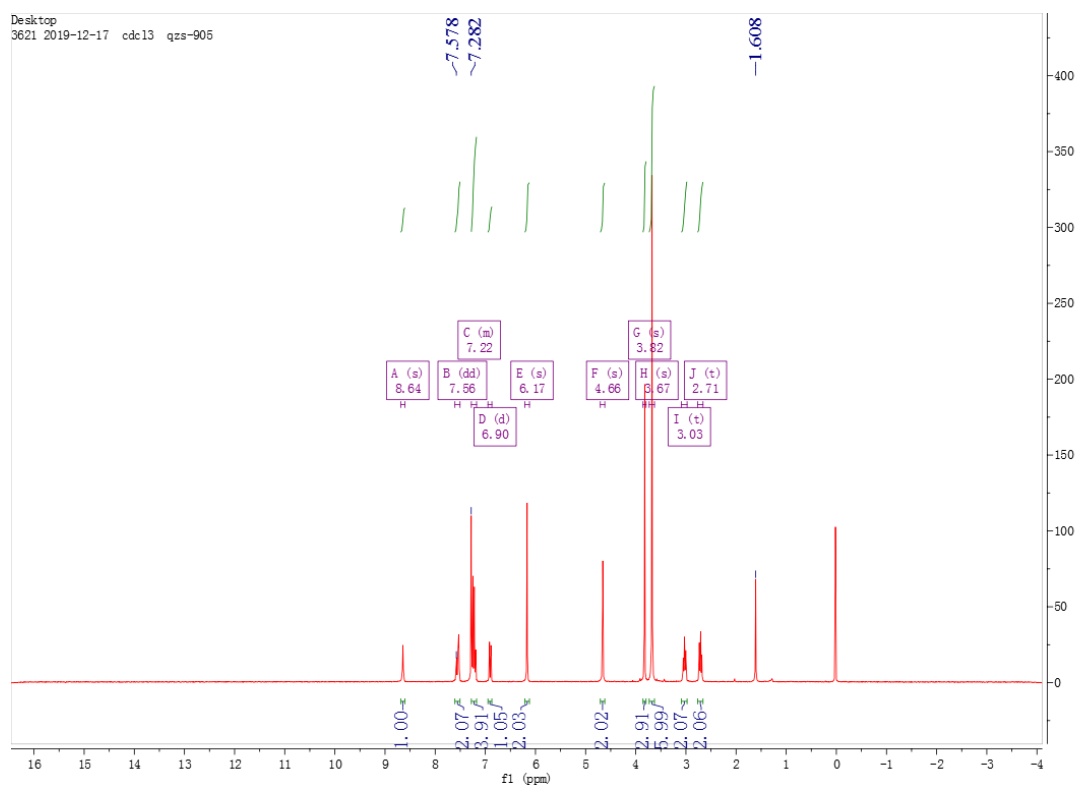

**Figure S9.** The  $^1\text{H}$  NMR compound D9

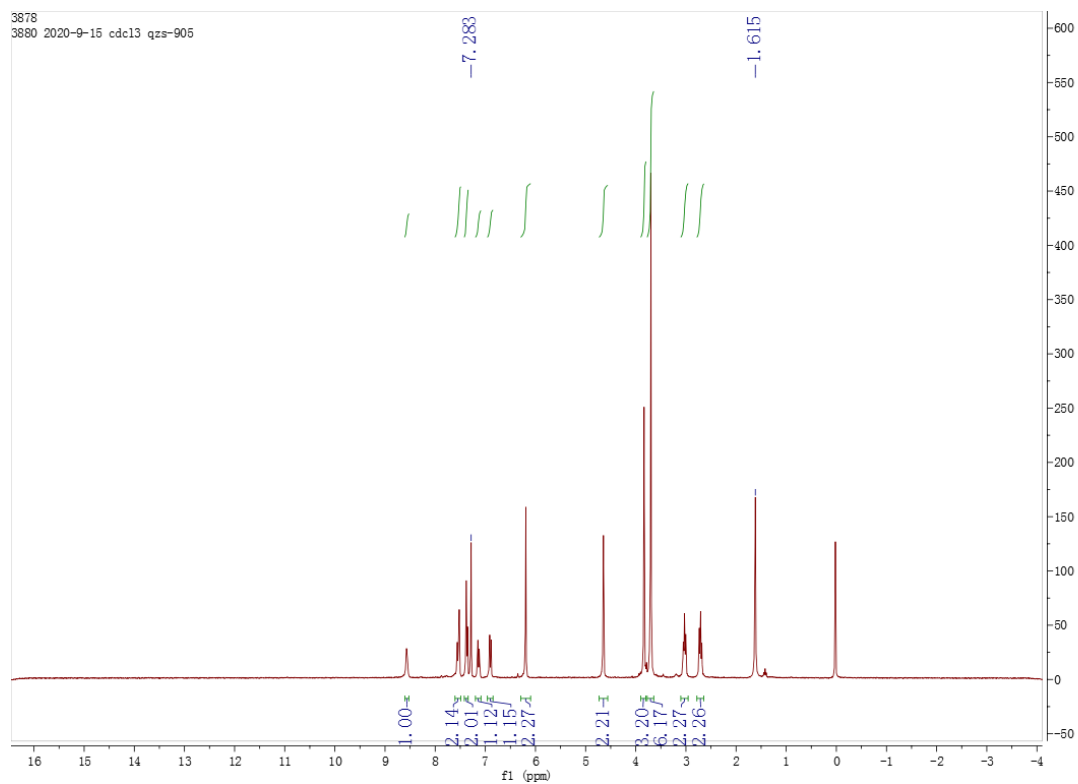

**Figure S10.** The  $^1\text{H}$  NMR compound D10

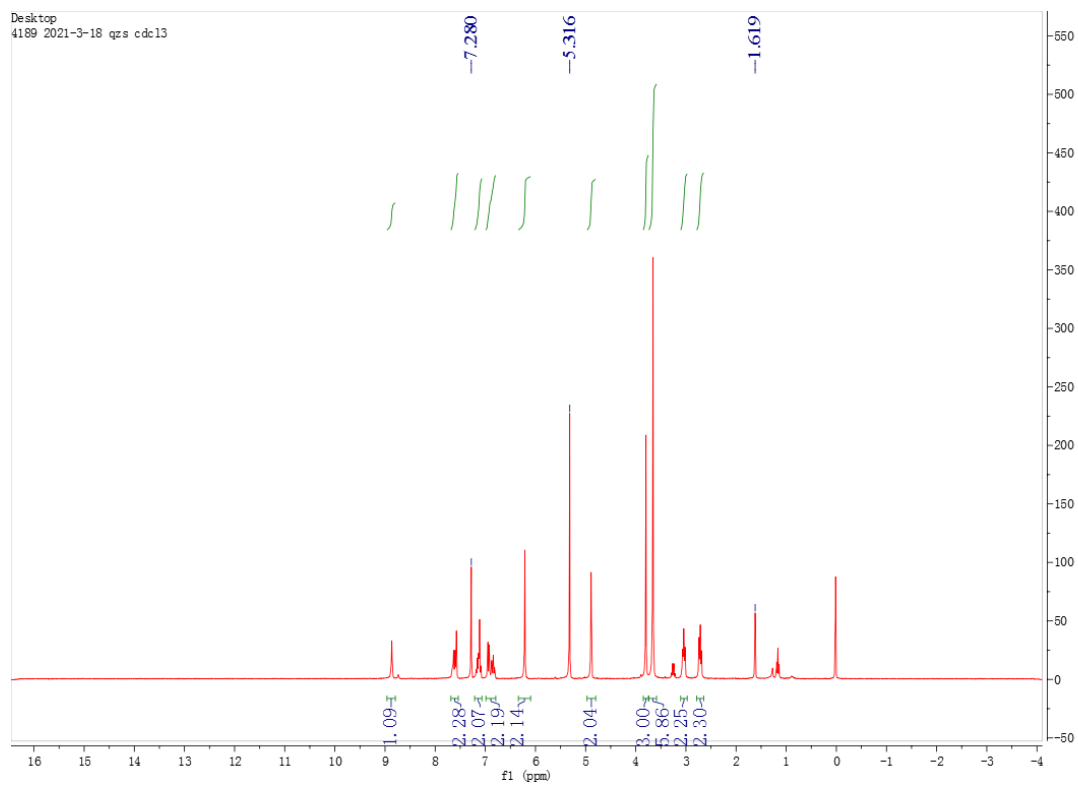

**Figure S11.** The  $^1\text{H}$  NMR compound D11

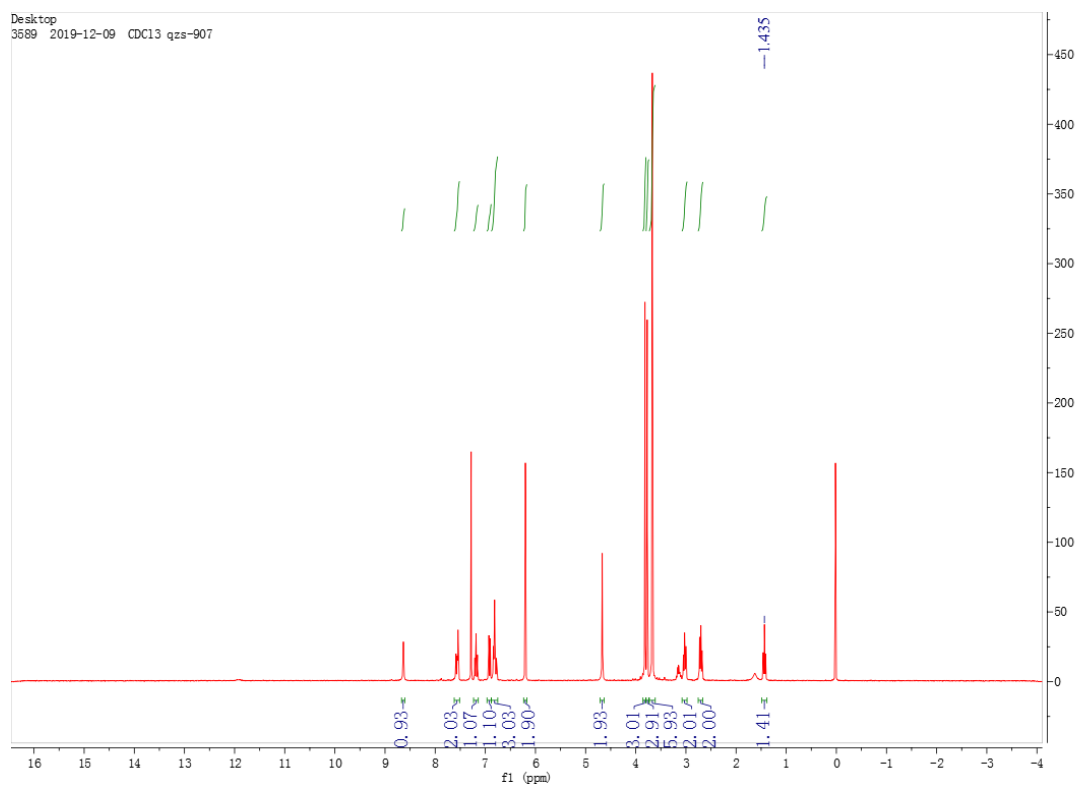

**Figure S12.** The  $^1\text{H}$  NMR compound D12

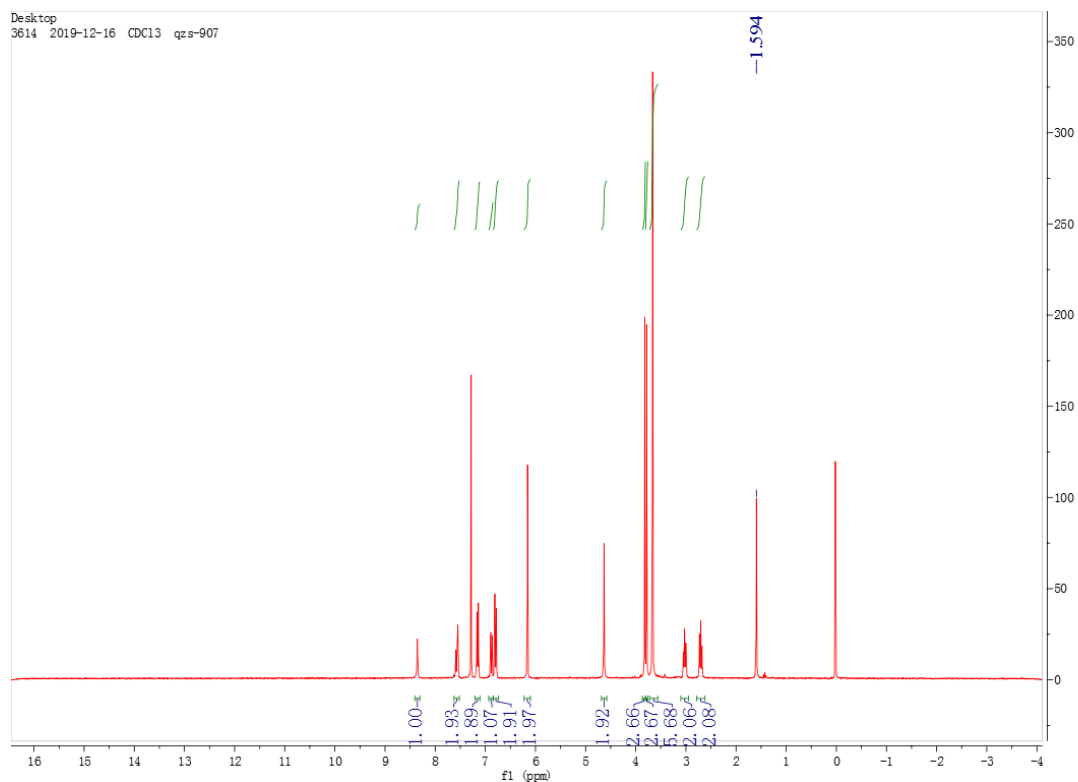

**Figure S13.** The  $^1\text{H}$  NMR compound D13

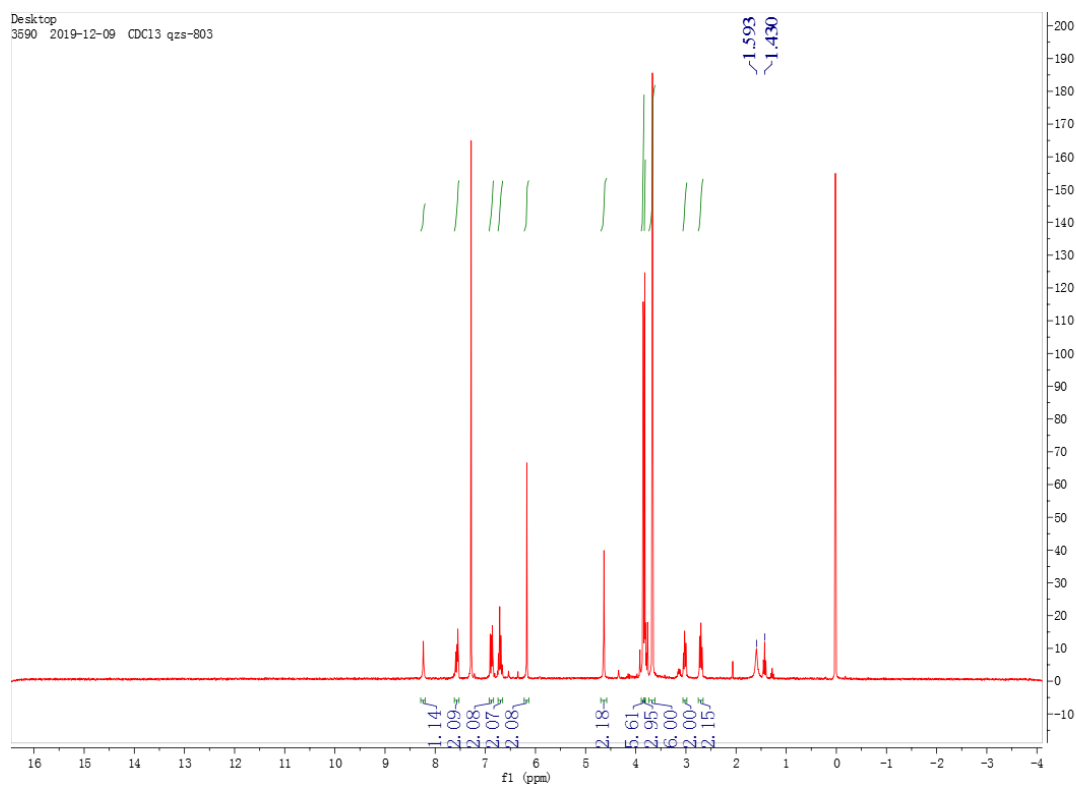

**Figure S14.** The  $^1\text{H}$  NMR compound D14

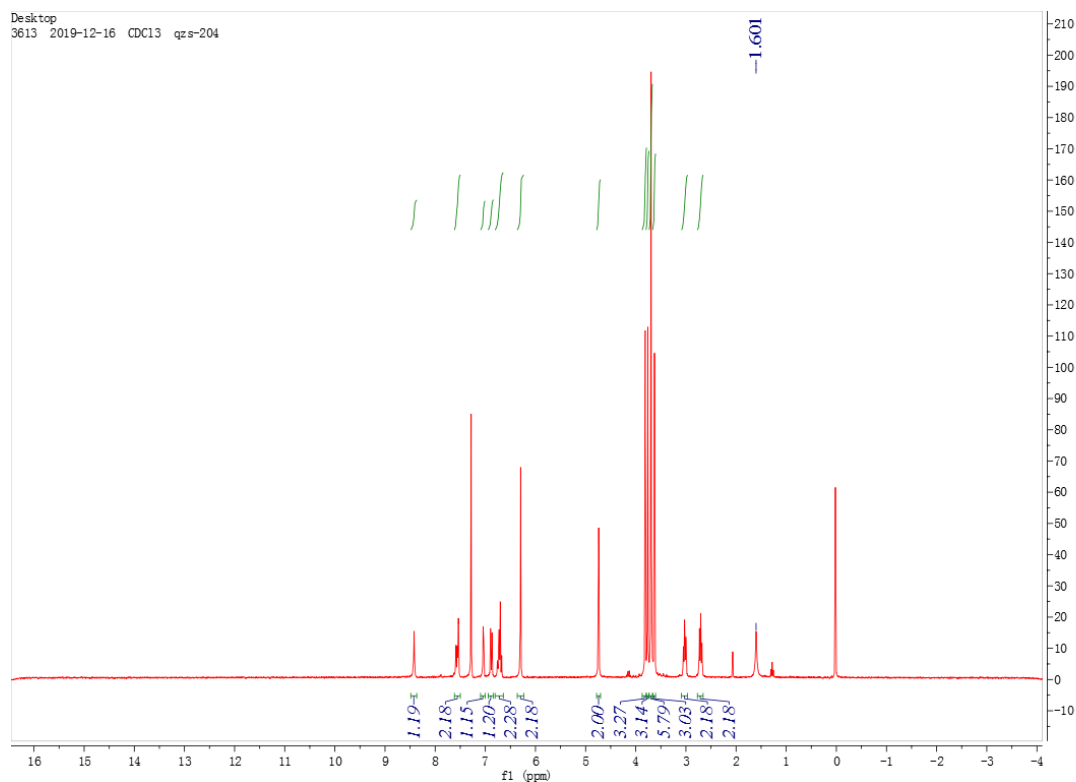

**Figure S15.** The  $^1\text{H}$  NMR compound D15

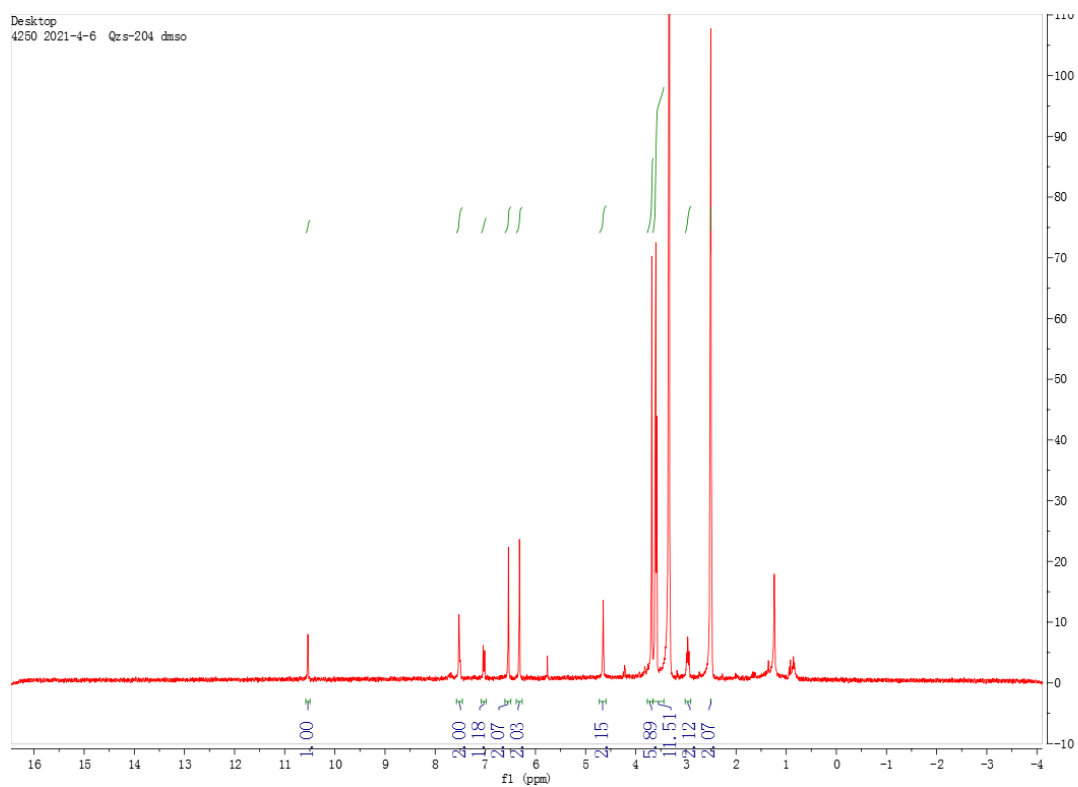

**Figure S16.** The  $^1\text{H}$  NMR compound D16
